# Supplementary material for: Failure of Translation Initiation of the Next Gene Decouples Transcription at Intercistronic Sites and the Resultant mRNA Generation
Source: PubMed Central journal article supplement (PMC9239205; doi:10.1128/mbio.01287-22), 2022-06-13
Supplement: mbio.01287-22-s0001.pdf [file mbio.01287-22-s0001.pdf]

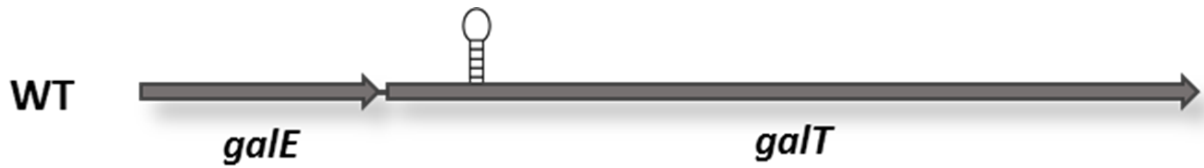

5' 1101-CTCACCGGGCAATGGATTCTGGTTTCACCGCACCGCGCTAAGCGCCCCTGGCAGGGGGC  
 GCAGGAAACGCCAGCCAAA CAGGTGTTACCTGCGCACGATCCAGATTGCTTCCTCTGCGCAGGTA  
 ATGTGCGGGTGACAGGCGATAAAAACCCCGATTACACCGGGACTTACGTTTTCACTAATGACTTTGC  
 GGCTTTGATGTCTGACACGCCAGATGCGCCAGAAAGTCACGATCCGCTGATGCGTTGCC-1350 3'

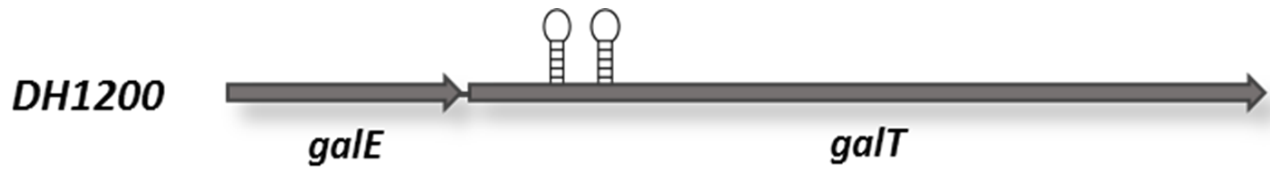

5' 1101-CTCACCGGGCAATGGATTCTGGTTTCACCGCACCGCGCTAAGCGCCCCTGGCAGGGGGC  
 GCAGGAAACGCCAGCCAAA CAGGTGTTACCTGCGCACGATCCAGACGTCGCTAAGCGCCCCTGGC  
 AGGGGGCGCAGGAAACGCCAGCCAAA GACGTCTTCCTCTGCGCAGGTAATGTGCGGGTGACAGG  
 CGATAAAAACCCCGATTACACCGGGACTTACGTTTTCACTAATGACTTTGCGGCTTTGAT-1300 3'
