# Supplementary material for: Failure of Translation Initiation of the Next Gene Decouples Transcription at Intercistronic Sites and the Resultant mRNA Generation
Source: PubMed Central journal article supplement (PMC9239205; doi:10.1128/mbio.01287-22), 2022-06-13
Supplement: mbio.01287-22-s0002.pdf [file mbio.01287-22-s0002.pdf]

-76 GAATTC TTGTGTAAAC GATTCCAATA

P2

-50 ATTTATTCCA TGTCACACTT TTCGCATCTT TGTTATGCTA TGGTTAATTC

P1

+1 ATACCATACG CGTTACAACC CGCTCACCGG GCAATGGATT CTGGTTTCAC

1129

Mlu I

1159

1170

+51 CGCACC GCGC TAAGCGCCCC TGGCAGGGGG CGCAGGAAAC GCCAGC CAAA

1183

1196

+101 CAGGTGTTAC CTGCGCACGA TCCA CTGCAG CAAATAACGT AAAAACC CGC

pst I

+151 TTCGGCGGGT TTTTATGG GGGGAGTTT

rpoC terminator
