# Supplementary material for: Failure of Translation Initiation of the Next Gene Decouples Transcription at Intercistronic Sites and the Resultant mRNA Generation
Source: PubMed Central journal article supplement (PMC9239205; doi:10.1128/mbio.01287-22), 2022-06-13
Supplement: mbio.01287-22-s0003.pdf [file mbio.01287-22-s0003.pdf]

A

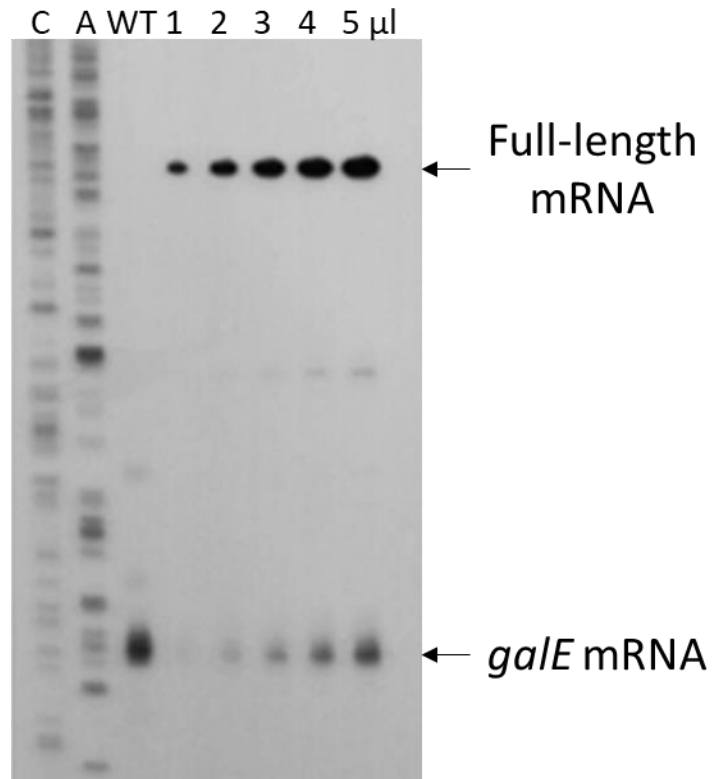

B

|                                                       | 1 $\mu$ l | 2 $\mu$ l | 3 $\mu$ l | 4 $\mu$ l | 5 $\mu$ l |
|-------------------------------------------------------|-----------|-----------|-----------|-----------|-----------|
| <b>Full-length mRNA</b>                               | 6,200     | 12,800    | 18,100    | 22,100    | 26,200    |
| <b><i>galE</i> mRNA</b>                               | 740       | 1,500     | 2,200     | 3,000     | 3,700     |
| <b>SUM</b>                                            | 6,920     | 14,300    | 20,300    | 25,100    | 29,700    |
| <b>Termination<br/>frequency:<br/><i>galE</i>/SUM</b> | 10.6%     | 10.4%     | 10.8%     | 11.9%     | 8.2%      |
