# Supplementary material for: Failure of Translation Initiation of the Next Gene Decouples Transcription at Intercistronic Sites and the Resultant mRNA Generation
Source: PubMed Central journal article supplement (PMC9239205; doi:10.1128/mbio.01287-22), 2022-06-13
Supplement: mbio.01287-22-s0004.pdf [file mbio.01287-22-s0004.pdf]

**Supplementary Table 1. Primers used in this study and usage.**

| Primer name            | Primer sequence 5' to 3'                    | Usage                                             |
|------------------------|---------------------------------------------|---------------------------------------------------|
| -75 <i>Eco</i> RI-F    | GCGAATTCAATTCTTGTGTAAACGATTCCAC             | Cloning the entire <i>gal</i> operon into pCC1BAC |
| <i>gal</i> /BamHI-R    | CCGGATCCGGTGATTTGAACAATATGAG                |                                                   |
| <i>gal</i> /HindIII-F  | CACCGTTTATGGCGATCAGCCC                      | Cloning                                           |
| <i>gal</i> /MluI-R     | GCGTTTTTCAGTCAGTATATGACG                    |                                                   |
| EHMM1-F                | TGCCAGGGGCGGTTAGCGCGGTGCGGTGA               | Site-directed mutagenesis                         |
| EH-restored-R          | GCGTTTCCTTCGCCCCCTGCCAGGGGCGAT<br>TAGCGCGGT |                                                   |
| ENO-stop-R             | GGTCGTTCTTTATCCGGATATC                      |                                                   |
| 1050_SD-1-F            | GATTAAGGAACGCCATGACGCAATTT                  |                                                   |
| 1050_SD-2-F            | GATTAAGGAACGCATGACGCAATTT                   |                                                   |
| 1050_SD-3-F            | GATTAAGGAACGATGACGCAATTT                    |                                                   |
| DH1200aatII-F          | GTTACCTGCGCACGATCCAGACGTC                   |                                                   |
| DH1200aatII-R          | ACATTACCTGCGCAGAGGAAGACGTC                  |                                                   |
| 850 MluI-R             | CCATTACGCGTATGGTATGAAATAACC                 |                                                   |
| 850 PstI-R             | CAAATTCACGCCTGCAGGCGCCTGATT                 |                                                   |
| E1-F                   | ATGAGAGTTCTGGTTACCGGTGGTAG                  | E-probe generation - Northern blot assay          |
| E1-R                   | TGGGCTTTTTTGCAGATCGGTGAGGA                  |                                                   |
| 3RP                    | AGCATGCGGCCGCTAAGAAC                        | 3' RACE - Reverse transcription and PCR           |
| 3' RNA Oligo           | UUCACUGUUCUUAGCGGCCGCAUGCU                  |                                                   |
| E3-F                   | CATCGCCCAGGTTGCTGTAG                        |                                                   |
| NewT6_1123-F           | TTTCACCGCACCGCGCTAA                         | 3' RACE - Extension primer                        |
| T1, T-ext1,T6-F        | ATGACGCAATTTAATCCCGTTGATCATC                |                                                   |
| <i>gal</i> +1170CtoG-R | ACACCTGTTTGGCTGCCGTTTCCTGCGCCC<br>CCT       |                                                   |
| <i>gal</i> +1170CtoA-R | ACACCTGTTTGGCTGTCGTTTCCTGCGCCC<br>CCT       |                                                   |

|                                   |                                |                                         |
|-----------------------------------|--------------------------------|-----------------------------------------|
| <i>gal</i> +1161CtoA-R            | GCGTTTCCTTCGCCCCCTGCCAGGGGCGCT | Construction of pausing mutants plasmid |
| <i>gal</i> +1161A-<br>+1170CtoG-R | CTGTTTGGCTGCCGTTTCCTTCGCCCC CT |                                         |
| <i>gal</i> +1161A+1170<br>CtoA-R  | CTGTTTGGCTGTCGTTTCCTTCGCCCCCT  |                                         |
